# Supplementary material for: Systematic rare Earth doping to adopt an R32 type huntite structure in NdSc3(BO3)4 crystals
Source: Royal Society of Chemistry journal article supplement (doi:10.1039/d3dt03942k), 2024-01-01
Supplement: d3dt03942k1.pdf [file d3dt03942k1.pdf]

## Systematic rare earth doping to adopt R32 huntite structure in $\text{NdSc}_3(\text{BO}_3)_4$ crystal.

Artem B. Kuznetsov<sup>1</sup>, Konstantin A. Kokh<sup>1</sup>, Ekaterina .V. Kaneva<sup>2</sup>, Ammar Y. Jamous<sup>1,3</sup>, Valery A. Svetlichnyi<sup>3</sup>, Nadezda G. Kononova<sup>1</sup>, Vyacheslav S. Shevchenko<sup>1</sup>, Anastasia A. Goreiavcheva<sup>1</sup> and Aleksander E. Kokh<sup>1</sup>

<sup>1</sup>Sobolev Institute of Geology and Mineralogy SB RAS, Novosibirsk 630090, Russia

<sup>2</sup>Vinogradov Institute of geochemistry SB RAS, Irkutsk 664033, Russia

<sup>3</sup>Tomsk State University, Tomsk 634050, Russia

KEYWORDS Rare earth borate, structure, crystal growth,

### Abstract

Huntite borates with R32 crystal structure have great potential in photonics applications as nonlinear and self-doubling media. This study is focused on determining the type and quantity of impurities responsible for converting the structure of  $\text{NdSc}_3(\text{BO}_3)_4$  to R32 polymorph. According to the single crystal X-ray diffraction of  $\text{R}_x\text{Nd}_y\text{Sc}_z(\text{BO}_3)_4$  ( $\text{R} = \text{Sm-Lu}$ ,  $x+y+z=4$ ), the obtained compounds crystallize in the space group R32 ( $\text{R} = \text{Eu, Er, Tm, Yb}$ ) and P3<sub>2</sub>21 ( $\text{R} = \text{Sm, Gd, Tb, Dy, Ho}$ ). Potential limitations to the future use of the crystals were identified, including compositional zoning and the possible presence of other polymorphic forms.

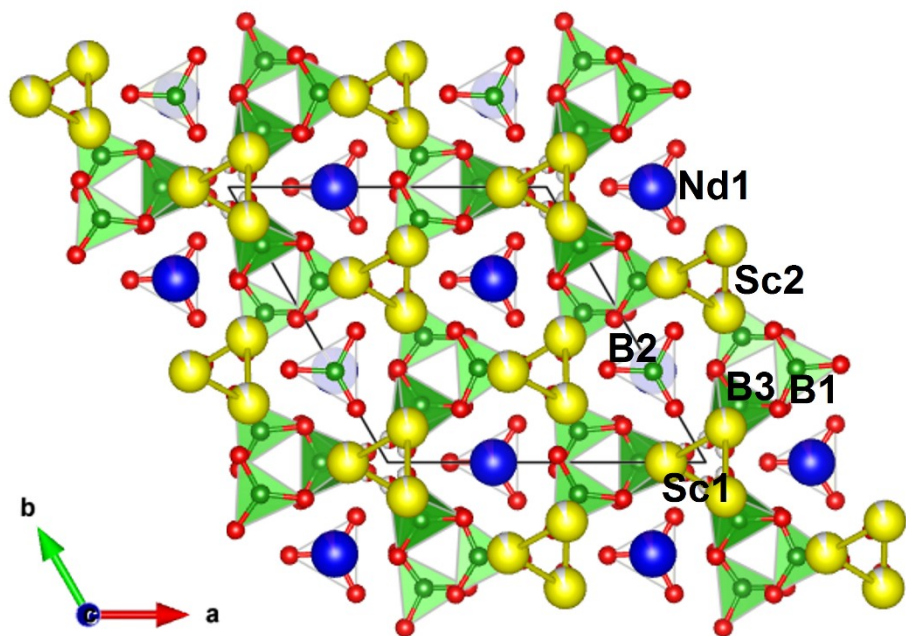

Figure S1. Crystal structure of NdSc<sub>3</sub>(BO<sub>3</sub>)<sub>4</sub>:R (R = Sm, Gd, Tb, Dy, Ho, Lu) (sp. gr. *P3<sub>2</sub>21*) compound projected down the *c* axis. Nd and Sc cations are blue and yellow spheres, BO<sub>3</sub> groups are shown as green triangles (B – green spheres, O – red spheres).

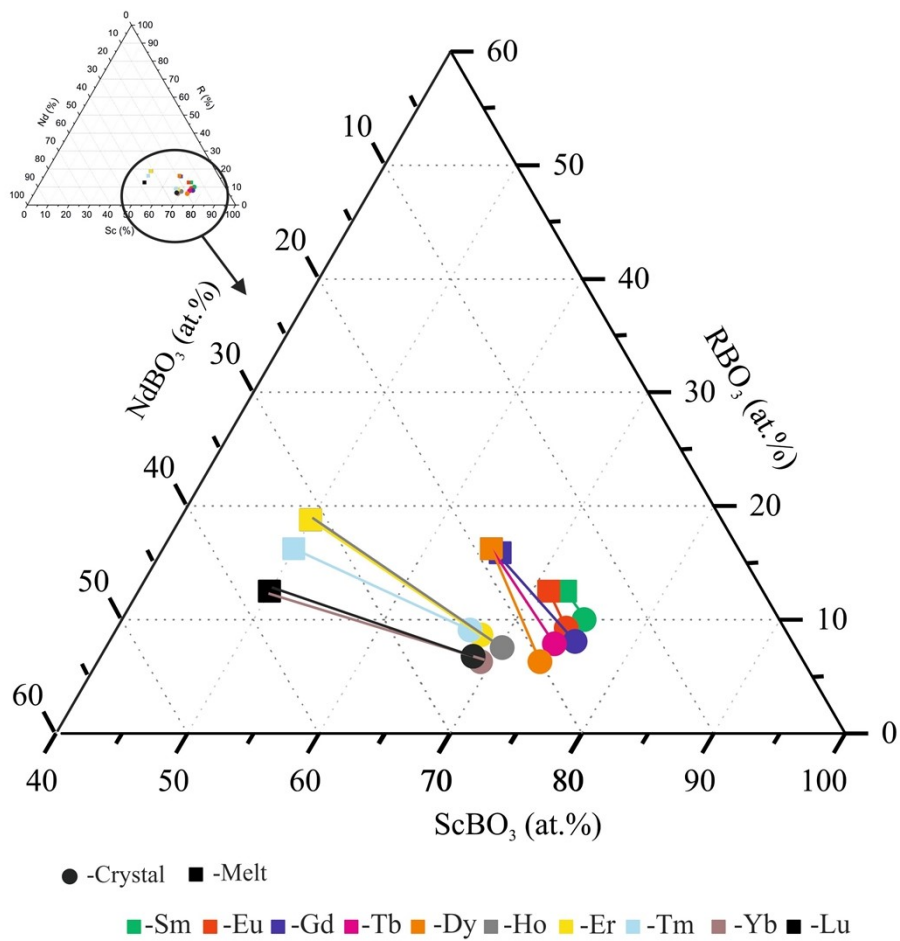

Figure S2. Relationship between the compositions in the melted batch and the compositions of the grown crystals.

**Table S1.** Selected bond distances (Å) for the coordination polyhedral of the studied NdSc<sub>3</sub>(BO<sub>3</sub>)<sub>4</sub>:R (R = Eu, Er, Tm, Yb) samples (sp. gr. R32).

|                        | <b>R=Eu</b> | <b>R=Er</b> | <b>R=Tm</b> | <b>R=Yb</b> |
|------------------------|-------------|-------------|-------------|-------------|
| Nd-O1 <sup>(×6)</sup>  | 2.43(2)     | 2.437(5)    | 2.440(2)    | 2.441(4)    |
| <i>m.a.n. (e)</i>      | 64.491      | 64.640      | 62.859      | 65.870      |
| Sc2-O1 <sup>(×2)</sup> | 2.110(2)    | 2.1243(6)   | 2.1271(4)   | 2.1192(6)   |
| Sc2-O2 <sup>(×2)</sup> | 2.13(2)     | 2.142(6)    | 2.149(3)    | 2.142(5)    |
| Sc2-O3 <sup>(×2)</sup> | 2.06(1)     | 2.069(4)    | 2.070(3)    | 2.065(4)    |
| <Sc2-O>                | 2.10        | 2.112       | 2.115       | 2.109       |
| <i>m.a.n. (e)</i>      | 23.772      | 25.106      | 26.979      | 24.269      |
| B1-O1 <sup>(×3)</sup>  | 1.374(7)    | 1.376(5)    | 1.378(3)    | 1.383(5)    |
| B2-O2                  | 1.36(3)     | 1.38(1)     | 1.366(6)    | 1.365(9)    |
| B2-O3 <sup>(×2)</sup>  | 1.36(1)     | 1.365(6)    | 1.368(3)    | 1.372(4)    |
| <B2-O >                | 1.36        | 1.37        | 1.367       | 1.370       |
| O1-B1-O1               | 120.0       | 120.0       | 120         | 120         |
| O2-B2-O3               | 117.9(6)    | 117.9(3)    | 118.1(2)    | 118.1(2)    |
| O2-B2-O3'              | 117.9(6)    | 117.9(3)    | 118.1(2)    | 118.1(2)    |
| O3-B2-O3'              | 124.2(7)    | 124.3(6)    | 123.8(3)    | 123.9(3)    |

**Table S2.** Valence balance calculation for studied sample NdSc<sub>3</sub>(BO<sub>3</sub>)<sub>4</sub>:R (R = Eu)

|          | <b>Nd1</b>            | <b>Sc2</b>                | <b>B1</b>             | <b>B2</b>             | <b>Σ</b>     |
|----------|-----------------------|---------------------------|-----------------------|-----------------------|--------------|
| O1       | 0.416 <sup>(×6)</sup> | 0.482 <sup>(×2)</sup>     | 0.994 <sup>(×3)</sup> | -                     | <b>1.892</b> |
| O2       |                       | 0.457 <sup>(×2)[×2]</sup> | -                     | 1.049                 | <b>1.963</b> |
| O3       |                       | 0.542 <sup>(×2)[×2]</sup> |                       | 1.023 <sup>(×2)</sup> | <b>2.107</b> |
| <b>Σ</b> | <b>2.496</b>          | <b>2.962</b>              | <b>2.982</b>          | <b>3.095</b>          |              |

<sup>(×2)</sup> – valence strengths doubled in the calculation of valence balance at the cations

[×2] – valence strengths doubled in the calculation of valence balance at the anions

**Table S3.** Valence balance calculation for studied sample NdSc<sub>3</sub>(BO<sub>3</sub>)<sub>4</sub>:R (R = Er)

|          | <b>Nd1</b>            | <b>Sc2</b>                              | <b>B1</b>             | <b>B2</b>             | <b>Σ</b>     |
|----------|-----------------------|-----------------------------------------|-----------------------|-----------------------|--------------|
| O1       | 0.406 <sup>(×6)</sup> | 0.467 <sup>(×2)</sup>                   | 0.989 <sup>(×3)</sup> | -                     | <b>1.862</b> |
| O2       |                       | 0.449 <sup>(×2)</sup> [ <sup>×2</sup> ] | -                     | 0.978                 | <b>1.876</b> |
| O3       |                       | 0.528 <sup>(×2)</sup> [ <sup>×2</sup> ] |                       | 1.020 <sup>(×2)</sup> | <b>2.076</b> |
| <b>Σ</b> | <b>2.436</b>          | <b>2.888</b>                            | <b>2.967</b>          | <b>3.018</b>          |              |

<sup>(×2)</sup> – valence strengths doubled in the calculation of valence balance at the cations

[<sup>×2</sup>] – valence strengths doubled in the calculation of valence balance at the anions

**Table S4.** Valence balance calculation for studied sample NdSc<sub>3</sub>(BO<sub>3</sub>)<sub>4</sub>:R (R = Tm)

|          | <b>Nd1</b>            | <b>Sc2</b>                              | <b>B1</b>             | <b>B2</b>             | <b>Σ</b>     |
|----------|-----------------------|-----------------------------------------|-----------------------|-----------------------|--------------|
| O1       | 0.403 <sup>(×6)</sup> | 0.464 <sup>(×2)</sup>                   | 0.983 <sup>(×3)</sup> | -                     | <b>1.850</b> |
| O2       |                       | 0.442 <sup>(×2)</sup> [ <sup>×2</sup> ] | -                     | 1.017                 | <b>1.901</b> |
| O3       |                       | 0.526 <sup>(×2)</sup> [ <sup>×2</sup> ] |                       | 1.011 <sup>(×2)</sup> | <b>2.063</b> |
| <b>Σ</b> | <b>2.418</b>          | <b>2.864</b>                            | <b>2.949</b>          | <b>3.039</b>          |              |

<sup>(×2)</sup> – valence strengths doubled in the calculation of valence balance at the cations

[<sup>×2</sup>] – valence strengths doubled in the calculation of valence balance at the anions

**Table S5.** Valence balance calculation for studied sample NdSc<sub>3</sub>(BO<sub>3</sub>)<sub>4</sub>:R (R = Yb)

|          | <b>Nd1</b>            | <b>Sc2</b>                              | <b>B1</b>             | <b>B2</b>             | <b>Σ</b>     |
|----------|-----------------------|-----------------------------------------|-----------------------|-----------------------|--------------|
| O1       | 0.402 <sup>(×6)</sup> | 0.472 <sup>(×2)</sup>                   | 0.970 <sup>(×3)</sup> | -                     | <b>1.844</b> |
| O2       |                       | 0.449 <sup>(×2)</sup> [ <sup>×2</sup> ] | -                     | 1.020                 | <b>1.918</b> |
| O3       |                       | 0.532 <sup>(×2)</sup> [ <sup>×2</sup> ] |                       | 1.000 <sup>(×2)</sup> | <b>2.064</b> |
| <b>Σ</b> | <b>2.412</b>          | <b>2.906</b>                            | <b>2.910</b>          | <b>3.020</b>          |              |

<sup>(×2)</sup> – valence strengths doubled in the calculation of valence balance at the cations

[<sup>×2</sup>] – valence strengths doubled in the calculation of valence balance at the anions

**Table S6.** Selected data on single crystals, data collection and structure refinement parameters of the studied NdSc<sub>3</sub>(BO<sub>3</sub>)<sub>4</sub>:R (R = Sm-Lu) samples.

|                                                                            | R=Sm                                            | R=Eu                               | R=Gd                                            | R=Tb                                            | R=Dy                                            | R=Ho                                            | R=Er                               | R=Tm                               | R=Yb                               | R=Lu                                            |
|----------------------------------------------------------------------------|-------------------------------------------------|------------------------------------|-------------------------------------------------|-------------------------------------------------|-------------------------------------------------|-------------------------------------------------|------------------------------------|------------------------------------|------------------------------------|-------------------------------------------------|
| <b>Crystal data</b>                                                        |                                                 |                                    |                                                 |                                                 |                                                 |                                                 |                                    |                                    |                                    |                                                 |
| <i>a</i> (Å)                                                               | 9.7768(3)                                       | 9.7610(3)                          | 9.781(1)                                        | 9.7594(6)                                       | 9.7577(3)                                       | 9.7655(3)                                       | 9.7999(4)                          | 9.8072(3)                          | 9.804(1)                           | 9.8013(4)                                       |
| <i>c</i> (Å)                                                               | 7.9305(3)                                       | 7.9185(2)                          | 7.9407(8)                                       | 7.9234(5)                                       | 7.9240(3)                                       | 7.9374(2)                                       | 7.9735(3)                          | 7.9928(3)                          | 7.969(1)                           | 7.9747(3)                                       |
| <i>V</i> (Å <sup>3</sup> )                                                 | 656.48(2)                                       | 653.38(2)                          | 657.87(7)                                       | 653.56(4)                                       | 653.39(2)                                       | 655.54(2)                                       | 663.08(2)                          | 665.76(2)                          | 663.26(8)                          | 663.46(2)                                       |
| <i>Z</i>                                                                   | 3                                               | 3                                  | 3                                               | 3                                               | 3                                               | 3                                               | 3                                  | 3                                  | 3                                  | 3                                               |
| Crystal dimensions (mm)                                                    | 0.26×0.24×<br>×0.15                             | 0.31×0.30×<br>×0.10                | 0.22×0.19×<br>×0.09                             | 0.24×0.22×<br>×0.09                             | 0.30×0.19×<br>×0.11                             | 0.25×0.22×<br>×0.10                             | 0.19×0.18×<br>×0.16                | 0.18×0.17×<br>×0.04                | 0.19×0.12×<br>×0.05                | 0.22×0.10×<br>×0.07                             |
| Crystal density                                                            | 3.794                                           | 4.181                              | 3.972                                           | 3.865                                           | 4.023                                           | 4.064                                           | 4.231                              | 4.264                              | 4.208                              | 4.049                                           |
| <b>Data collection</b>                                                     |                                                 |                                    |                                                 |                                                 |                                                 |                                                 |                                    |                                    |                                    |                                                 |
| Reflections measured                                                       | 30027                                           | 5566                               | 29162                                           | 31713                                           | 19846                                           | 88792                                           | 8635                               | 9737                               | 12042                              | 19026                                           |
| Independent reflections                                                    | 2121                                            | 710                                | 2128                                            | 2110                                            | 2111                                            | 2932                                            | 728                                | 733                                | 575                                | 1697                                            |
| R <sub>merging</sub> [R <sub>(int)</sub> ] (%)                             | 6.2                                             | 4.8                                | 4.9                                             | 4.5                                             | 5.7                                             | 6.1                                             | 4.2                                | 4.6                                | 3.6                                | 4.4                                             |
| <i>h</i> <sub>min</sub> , <i>h</i> <sub>max</sub>                          | -16, 16                                         | -16, 16                            | -16, 16                                         | -16, 16                                         | -16, 16                                         | -18, 17                                         | -16, 16                            | -16, 16                            | -15, 15                            | -15, 15                                         |
| <i>k</i> <sub>min</sub> , <i>k</i> <sub>max</sub>                          | -16, 16                                         | -16, 15                            | -16, 16                                         | -16, 16                                         | -16, 16                                         | -18, 18                                         | -16, 16                            | -16, 16                            | -15, 15                            | -15, 15                                         |
| <i>l</i> <sub>min</sub> , <i>l</i> <sub>max</sub>                          | -13, 13                                         | -11, 13                            | -13, 13                                         | -13, 13                                         | -13, 13                                         | -14, 14                                         | -13, 13                            | -13, 13                            | -12, 12                            | -12, 12                                         |
| <b>Refinement</b>                                                          |                                                 |                                    |                                                 |                                                 |                                                 |                                                 |                                    |                                    |                                    |                                                 |
| Space group                                                                | <i>P</i> <sub>3</sub> <sub>2</sub> <sub>1</sub> | <i>R</i> <sub>3</sub> <sub>2</sub> | <i>P</i> <sub>3</sub> <sub>2</sub> <sub>1</sub> | <i>R</i> <sub>3</sub> <sub>2</sub> | <i>R</i> <sub>3</sub> <sub>2</sub> | <i>R</i> <sub>3</sub> <sub>2</sub> | <i>P</i> <sub>3</sub> <sub>2</sub> <sub>1</sub> |
| Reflections used in the refinement ( <i>I</i> > 3σ <sub>(<i>I</i>)</sub> ) | 1963                                            | 701                                | 1929                                            | 1995                                            | 1899                                            | 2582                                            | 724                                | 731                                | 573                                | 1563                                            |
| N. of refined parameters                                                   | 102                                             | 44                                 | 107                                             | 106                                             | 107                                             | 107                                             | 44                                 | 44                                 | 44                                 | 107                                             |
| <i>R</i> <sup>a</sup> [on <i>F</i> ] (%)                                   | 7.95                                            | 5.24                               | 2.12                                            | 6.59                                            | 6.79                                            | 6.64                                            | 3.10                               | 1.73                               | 2.81                               | 6.70                                            |
| <i>R</i> <sub>w</sub> <sup>b</sup> [on <i>F</i> ] (%)                      | 8.52                                            | 5.83                               | 2.92                                            | 8.13                                            | 8.54                                            | 7.35                                            | 3.44                               | 1.83                               | 3.46                               | 9.48                                            |
| Goof <sup>c</sup>                                                          | 1.0269                                          | 1.0704                             | 1.0560                                          | 1.0097                                          | 1.0248                                          | 1.1529                                          | 1.0808                             | 1.0836                             | 1.0240                             | 0.9692                                          |
| Δρ <sub>min</sub> /Δρ <sub>max</sub> (e <sup>-</sup> /Å <sup>3</sup> )     | -6.95/2.92                                      | -5.60/2.50                         | -4.70/2.66                                      | -4.53/2.64                                      | -7.37/2.59                                      | -3.89/2.44                                      | -3.52/1.40                         | -1.90/0.90                         | -3.26/1.04                         | -4.92/2.36                                      |

$$^a R = \frac{\sum[|F_o| - |F_c|]}{\sum|F_o|}$$

$$^b R_w = \frac{[\sum[w(F_o^2 - F_c^2)^2]/\sum[w(F_o^2)^2]]^{1/2}}{w} ; w = \text{Chebyshev optimized weights.}$$

$$^c \text{Goodness-of-fit} = [\sum[w(F_o^2 - F_c^2)^2]/(N-p)]^{1/2}, \text{ where } N \text{ and } p \text{ are the number of reflections and parameters, respectively.}$$

**Table S7.** Selected bond distances (Å) for the coordination polyhedra of the studied NdSc<sub>3</sub>(BO<sub>3</sub>)<sub>4</sub>:R (R = Sm, Gd, Tb, Dy, Ho, Lu) samples (sp. gr. P3<sub>2</sub>21).

|                        | <b>R=Sm</b>   | <b>R=Gd</b>   | <b>R=Tb</b>   | <b>R=Dy</b>   | <b>R=Ho</b>   | <b>R=Lu</b>   |
|------------------------|---------------|---------------|---------------|---------------|---------------|---------------|
| Nd1-O1 <sup>(×2)</sup> | 2.422(6)      | 2.419(6)      | 2.415(6)      | 2.421(6)      | 2.424(6)      | 2.455(6)      |
| Nd1-O2                 | 2.802(5)      | 2.803(5)      | 2.791(4)      | 2.798(5)      | 2.820(5)      | 2.805(6)      |
| Nd1-O3 <sup>(×2)</sup> | 2.448(4)      | 2.447(3)      | 2.437(3)      | 2.441(3)      | 2.445(3)      | 2.453(4)      |
| Nd1-O4 <sup>(×2)</sup> | 3.009(5)      | 3.011(4)      | 2.999(4)      | 3.007(4)      | 3.002(4)      | 3.052(6)      |
| Nd1-O5 <sup>(×2)</sup> | 2.401(6)      | 2.401(6)      | 2.381(5)      | 2.401(6)      | 2.401(5)      | 2.438(7)      |
| <Nd1-O>                | 2.596         | 2.595         | 2.584         | 2.593         | 2.596         | 2.622         |
| <i>m.a.n. (e)</i>      | <i>54.600</i> | <i>61.132</i> | <i>58.240</i> | <i>61.938</i> | <i>62.257</i> | <i>58.878</i> |
| Sc1-O2                 | 2.026(8)      | 2.019(8)      | 2.023(7)      | 2.001(8)      | 2.005(8)      | 2.007(9)      |
| Sc1-O2'                | 2.026(7)      | 2.019(7)      | 2.023(6)      | 2.002(7)      | 2.005(7)      | 2.007(8)      |
| Sc1-O2''               | 2.363(7)      | 2.365(7)      | 2.340(6)      | 2.366(7)      | 2.345(7)      | 2.432(8)      |
| Sc1-O2'''              | 2.363(6)      | 2.365(6)      | 2.340(6)      | 2.366(6)      | 2.346(6)      | 2.432(7)      |
| Sc1-O5                 | 2.121(5)      | 2.119(5)      | 2.130(4)      | 2.112(5)      | 2.103(4)      | 2.083(6)      |
| Sc1-O5                 | 2.122(7)      | 2.119(6)      | 2.131(5)      | 2.113(6)      | 2.103(6)      | 2.083(7)      |
| Sc1-O6                 | 2.148(4)      | 2.146(4)      | 2.136(4)      | 2.140(4)      | 2.148(4)      | 2.178(4)      |
| Sc1-O6                 | 2.148(4)      | 2.147(4)      | 2.136(4)      | 2.141(4)      | 2.148(4)      | 2.179(4)      |
| <Sc1-O>                | 2.165         | 2.162         | 2.157         | 2.155         | 2.150         | 2.175         |
| <i>m.a.n. (e)</i>      | <i>19.194</i> | <i>20.013</i> | <i>18.837</i> | <i>20.286</i> | <i>21.126</i> | <i>20.916</i> |
| Sc2-O1                 | 2.087(7)      | 2.093(7)      | 2.087(6)      | 2.094(7)      | 2.079(6)      | 2.097(7)      |
| Sc2-O3                 | 2.034(4)      | 2.031(3)      | 2.035(3)      | 2.033(3)      | 2.033(3)      | 2.038(4)      |
| Sc2-O4                 | 2.146(4)      | 2.154(4)      | 2.148(5)      | 2.149(4)      | 2.152(4)      | 2.157(5)      |
| Sc2-O4'                | 2.161(6)      | 2.162(5)      | 2.148(4)      | 2.156(5)      | 2.159(5)      | 2.181(7)      |
| Sc2-O7                 | 2.105(4)      | 2.104(4)      | 2.096(3)      | 2.098(4)      | 2.096(3)      | 2.112(5)      |
| Sc2-O7'                | 2.114(4)      | 2.119(4)      | 2.118(3)      | 2.118(4)      | 2.121(3)      | 2.126(4)      |
| <Sc2-O>                | 2.108         | 2.111         | 2.105         | 2.108         | 2.107         | 2.119         |
| <i>m.a.n. (e)</i>      | <i>21.253</i> | <i>22.541</i> | <i>21.315</i> | <i>22.602</i> | <i>23.502</i> | <i>26.274</i> |
| B1-O3                  | 1.363(8)      | 1.373(7)      | 1.362(7)      | 1.359(7)      | 1.347(7)      | 1.373(9)      |
| B1-O4                  | 1.362(5)      | 1.358(5)      | 1.362(5)      | 1.350(5)      | 1.359(5)      | 1.362(6)      |
| B1-O5                  | 1.362(9)      | 1.367(9)      | 1.369(8)      | 1.369(9)      | 1.397(8)      | 1.36(1)       |
| <B1-O >                | 1.362         | 1.366         | 1.364         | 1.359         | 1.368         | 1.365         |

|            |          |          |          |          |          |          |
|------------|----------|----------|----------|----------|----------|----------|
| B2-O6      | 1.294(6) | 1.318(5) | 1.314(5) | 1.304(5) | 1.272(5) | 1.307(6) |
| B2-O7 (*2) | 1.401(8) | 1.391(8) | 1.392(7) | 1.391(8) | 1.410(7) | 1.378(9) |
| <B2-O >    | 1.365    | 1.367    | 1.366    | 1.362    | 1.364    | 1.354    |
| B3-O1 (*2) | 1.339(6) | 1.339(6) | 1.337(5) | 1.325(5) | 1.351(5) | 1.310(6) |
| B3-O2      | 1.533(9) | 1.54(1)  | 1.532(9) | 1.54(1)  | 1.514(9) | 1.56(1)  |
| B3-O2'     | 1.53(1)  | 1.54(1)  | 1.532(9) | 1.54(1)  | 1.51(1)  | 1.56(1)  |
| <B3-O >    | 1.404    | 1.406    | 1.402    | 1.468    | 1.458    | 1.393    |
| O3-B1-O4   | 117.7(5) | 116.9(4) | 116.9(4) | 117.3(4) | 117.8(4) | 115.7(5) |
| O3-B1-O5   | 125.2(5) | 124.8(4) | 125.5(4) | 124.5(4) | 124.7(4) | 124.6(5) |
| O4-B1-O5   | 117.1(5) | 118.3(4) | 117.6(4) | 118.1(4) | 117.4(4) | 119.8(5) |
| O6-B2-O7   | 123.1(4) | 122.0(4) | 122.4(5) | 122.5(5) | 123.4(5) | 120.8(5) |
| O6-B2-O7'  | 123.1(5) | 122.0(5) | 122.4(5) | 122.5(5) | 123.4(5) | 120.8(5) |
| O7-B2-O7'  | 113.8(5) | 115.9(4) | 115.3(4) | 115.1(5) | 113.1(4) | 118.3(5) |
| O1-B3-O1'  | 124.9(8) | 125.4(7) | 124.5(7) | 124.9(7) | 122.7(7) | 128.2(9) |
| O1-B3-O2   | 106.0(4) | 105.8(4) | 105.7(3) | 106.2(4) | 107.4(3) | 105.8(4) |
| O1'-B3-O2  | 124.8(5) | 124.5(4) | 125.6(4) | 124.3(4) | 125.5(4) | 121.1(5) |

---



**Table S8.** Valence balance calculation for studied sample NdSc<sub>3</sub>(BO<sub>3</sub>)<sub>4</sub>:R (R = Sm)

|          | <b>Nd1</b>            | <b>Sc1</b>                                     | <b>Sc2</b>     | <b>B1</b>    | <b>B2</b>             | <b>B3</b>             | <b>Σ</b>           |
|----------|-----------------------|------------------------------------------------|----------------|--------------|-----------------------|-----------------------|--------------------|
| O1       | 0.423 <sup>(×2)</sup> | -                                              | 0.507          | -            | -                     | 1.097 <sup>(×2)</sup> | <b>2.027</b>       |
| O2       | 0.152                 | 0.580 <sup>(×2)</sup><br>0.275 <sup>(×2)</sup> | -              | -            | -                     | 0.637/0.642           | <b>1.644/1.649</b> |
| O3       | 0.395 <sup>(×2)</sup> | -                                              | 0.776          | 1.026        | -                     | -                     | <b>2.179</b>       |
| O4       | 0.087 <sup>(×2)</sup> | -                                              | 0.445<br>0.430 | 1.028        | -                     | -                     | <b>1.990</b>       |
| O5       | 0.448 <sup>(×2)</sup> | 0.470/0.469                                    | -              | 1.028        | -                     | -                     | <b>1.945/1.946</b> |
| O6       | -                     | 0.443 <sup>(×2)</sup> [×2]                     | -              | -            | 1.244                 | -                     | <b>2.130</b>       |
| O7       | -                     | -                                              | 0.487<br>0.478 | -            | 0.922 <sup>(×2)</sup> | -                     | <b>1.887</b>       |
| <b>Σ</b> | <b>2.858</b>          | <b>2.375/2.985</b>                             | <b>3.132</b>   | <b>3.082</b> | <b>3.088</b>          | <b>2.831/2.836</b>    |                    |

<sup>(×2)</sup> – valence strengths doubled in the calculation of valence balance at the cations

[×2] – valence strengths doubled in the calculation of valence balance at the anions

**Table S9.** Valence balance calculation for studied sample NdSc<sub>3</sub>(BO<sub>3</sub>)<sub>4</sub>:R (R = Gd)

|          | <b>Nd1</b>            | <b>Sc1</b>                                     | <b>Sc2</b>     | <b>B1</b>    | <b>B2</b>             | <b>B3</b>             | <b>Σ</b>     |
|----------|-----------------------|------------------------------------------------|----------------|--------------|-----------------------|-----------------------|--------------|
| O1       | 0.427 <sup>(×2)</sup> | -                                              | 0.500          | -            | -                     | 1.097 <sup>(×2)</sup> | <b>2.024</b> |
| O2       | 0.152                 | 0.589 <sup>(×2)</sup><br>0.274 <sup>(×2)</sup> | -              | -            | -                     | 0.625                 | <b>1.640</b> |
| O3       | 0.396 <sup>(×2)</sup> | -                                              | 0.574          | 0.997        | -                     | -                     | <b>1.967</b> |
| O4       | 0.087 <sup>(×2)</sup> | -                                              | 0.437<br>0.430 | 1.040        | -                     | -                     | <b>1.994</b> |
| O5       | 0.448 <sup>(×2)</sup> | 0.472 <sup>(×2)</sup>                          | -              | 1.014        | -                     | -                     | <b>1.934</b> |
| O6       | -                     | 0.445 <sup>(×2)</sup> [×2]                     | -              | -            | 1.163                 | -                     | <b>2.053</b> |
| O7       | -                     | -                                              | 0.488<br>0.472 | -            | 0.948 <sup>(×2)</sup> | -                     | <b>1.908</b> |
| <b>Σ</b> | <b>2.868</b>          | <b>2.382/3.012</b>                             | <b>2.901</b>   | <b>3.051</b> | <b>3.059</b>          | <b>2.819</b>          |              |

<sup>(×2)</sup> – valence strengths doubled in the calculation of valence balance at the cations

[×2] – valence strengths doubled in the calculation of valence balance at the anions

**Table S10.** Valence balance calculation for studied sample NdSc<sub>3</sub>(BO<sub>3</sub>)<sub>4</sub>:R (R = Tb)

|          | <b>Nd1</b>            | <b>Sc1</b>                                     | <b>Sc2</b>                  | <b>B1</b>    | <b>B2</b>             | <b>B3</b>             | <b>Σ</b>           |
|----------|-----------------------|------------------------------------------------|-----------------------------|--------------|-----------------------|-----------------------|--------------------|
| O1       | 0.431 <sup>(×2)</sup> | -                                              | 0.507                       | -            | -                     | 1.103 <sup>(×2)</sup> | <b>2.041</b>       |
| O2       | 0.157                 | 0.584 <sup>(×2)</sup><br>0.290 <sup>(×2)</sup> | -                           | -            | -                     | 0.639                 | <b>1.670</b>       |
| O3       | 0.406 <sup>(×2)</sup> | -                                              | 0.569                       | 1.028        | -                     | -                     | <b>2.003</b>       |
| O4       | 0.089 <sup>(×2)</sup> | -                                              | 0.443 <sup>(×2)</sup> [ ×2] | 1.028        | -                     | -                     | <b>2.003</b>       |
| O5       | 0.473 <sup>(×2)</sup> | 0.460/0.461                                    | -                           | 1.008        | -                     | -                     | <b>1.941/1.942</b> |
| O6       | -                     | 0.455 <sup>(×2)</sup> [ ×2]                    | -                           | -            | 1.176                 | -                     | <b>2.086</b>       |
| O7       | -                     | -                                              | 0.497<br>0.473              | -            | 0.946 <sup>(×2)</sup> | -                     | <b>1.916</b>       |
| <b>Σ</b> | <b>2.955</b>          | <b>2.411/2.999</b>                             | <b>2.932</b>                | <b>3.064</b> | <b>3.068</b>          | <b>2.845</b>          |                    |

<sup>(×2)</sup> – valence strengths doubled in the calculation of valence balance at the cations

[×2] – valence strengths doubled in the calculation of valence balance at the anions

**Table S11.** Valence balance calculation for studied sample NdSc<sub>3</sub>(BO<sub>3</sub>)<sub>4</sub>:R (R = Dy)

|          | <b>Nd1</b>            | <b>Sc1</b>                           | <b>Sc2</b>     | <b>B1</b>    | <b>B2</b>             | <b>B3</b>             | <b>Σ</b>           |
|----------|-----------------------|--------------------------------------|----------------|--------------|-----------------------|-----------------------|--------------------|
| O1       | 0.424 <sup>(×2)</sup> | -                                    | 0.499          | -            | -                     | 1.141 <sup>(×2)</sup> | <b>2.064</b>       |
| O2       | 0.154                 | 0.613/0.612<br>0.273 <sup>(×2)</sup> | -              | -            | -                     | 0.625                 | <b>1.664/1.665</b> |
| O3       | 0.402 <sup>(×2)</sup> | -                                    | 0.571          | 1.037        | -                     | -                     | <b>2.010</b>       |
| O4       | 0.087 <sup>(×2)</sup> | -                                    | 0.442<br>0.435 | 1.064        | -                     | -                     | <b>2.028</b>       |
| O5       | 0.448 <sup>(×2)</sup> | 0.480/0.479                          | -              | 1.008        | -                     | -                     | <b>1.935/1.936</b> |
| O6       | -                     | 0.451<br>0.450                       | -              | -            | 1.210                 | -                     | <b>2.111</b>       |
| O7       | -                     | -                                    | 0.495<br>0.473 | -            | 0.948 <sup>(×2)</sup> | -                     | <b>1.916</b>       |
| <b>Σ</b> | <b>2.876</b>          | <b>2.406/3.085</b>                   | <b>2.915</b>   | <b>3.109</b> | <b>3.106</b>          | <b>2.391</b>          |                    |

<sup>(×2)</sup> – valence strengths doubled in the calculation of valence balance at the cations

[×2] – valence strengths doubled in the calculation of valence balance at the anions

**Table S12.** Valence balance calculation for studied sample NdSc<sub>3</sub>(BO<sub>3</sub>)<sub>4</sub>:R (R = Ho)

|          | <b>Nd1</b>            | <b>Sc1</b>                              | <b>Sc2</b>     | <b>B1</b>    | <b>B2</b>             | <b>B3</b>             | <b>Σ</b>         |
|----------|-----------------------|-----------------------------------------|----------------|--------------|-----------------------|-----------------------|------------------|
| O1       | 0.421 <sup>(×2)</sup> | -                                       | 0.516          | -            | -                     | 1.061 <sup>(×2)</sup> | <b>2.064</b>     |
| O2       | 0.145                 | 0.608 <sup>(×2)</sup><br>0.287/0.286    | -              | -            | -                     | 0.672/0.679           | <b>1.71/1.72</b> |
| O3       | 0.398 <sup>(×2)</sup> | -                                       | 0.571          | 1.073        | -                     | -                     | <b>2.042</b>     |
| O4       | 0.089 <sup>(×2)</sup> | -                                       | 0.439<br>0.432 | 1.037        | -                     | -                     | <b>1.997</b>     |
| O5       | 0.448 <sup>(×2)</sup> | 0.489 <sup>(×2)</sup>                   | -              | 0.932        | -                     | -                     | <b>1.869</b>     |
| O6       | -                     | 0.443 <sup>(×2)</sup> [ <sup>×2</sup> ] | -              | -            | 1.323                 | -                     | <b>2.209</b>     |
| O7       | -                     | -                                       | 0.497<br>0.470 | -            | 0.899 <sup>(×2)</sup> | -                     | <b>1.866</b>     |
| <b>Σ</b> | <b>2.857</b>          | <b>2.438/3.080</b>                      | <b>2.925</b>   | <b>3.042</b> | <b>3.121</b>          | <b>2.794/2.801</b>    |                  |

<sup>(×2)</sup> – valence strengths doubled in the calculation of valence balance at the cations

[<sup>×2</sup>] – valence strengths doubled in the calculation of valence balance at the anions

**Table S13.** Valence balance calculation for studied sample NdSc<sub>3</sub>(BO<sub>3</sub>)<sub>4</sub>:R (R = Lu)

|          | <b>Nd1</b>            | <b>Sc1</b>                                     | <b>Sc2</b>     | <b>B1</b>    | <b>B2</b>             | <b>B3</b>             | <b>Σ</b>     |
|----------|-----------------------|------------------------------------------------|----------------|--------------|-----------------------|-----------------------|--------------|
| O1       | 0.387 <sup>(×2)</sup> | -                                              | 0.496          | -            | -                     | 1.190 <sup>(×2)</sup> | <b>2.073</b> |
| O2       | 0.151 <sup>(×2)</sup> | 0.605 <sup>(×2)</sup><br>0.236 <sup>(×2)</sup> | -              | -            | -                     | 0.591                 | <b>1.583</b> |
| O3       | 0.389 <sup>(×2)</sup> | -                                              | 0.565          | 0.997        | -                     | -                     | <b>1.951</b> |
| O4       | 0.077 <sup>(×2)</sup> | -                                              | 0.434<br>0.412 | 1.028        | -                     | -                     | <b>1.951</b> |
| O5       | 0.405 <sup>(×2)</sup> | 0.512 <sup>(×2)</sup>                          | -              | 1.034        | -                     | -                     | <b>1.951</b> |
| O6       | -                     | 0.415<br>0.414                                 | -              | -            | 1.200                 | -                     | <b>2.029</b> |
| O7       | -                     | -                                              | 0.480<br>0.465 | -            | 0.983 <sup>(×2)</sup> | -                     | <b>1.928</b> |
| <b>Σ</b> | <b>2.818</b>          | <b>2.325/3.063</b>                             | <b>2.852</b>   | <b>3.059</b> | <b>3.166</b>          | <b>2.971</b>          |              |

<sup>(×2)</sup> – valence strengths doubled in the calculation of valence balance at the cations

[<sup>×2</sup>] – valence strengths doubled in the calculation of valence balance at the anions

**Table S14.** Crystallographic coordinates, occupancies and equivalent/isotropic atomic displacement parameters ( $\text{\AA}^2$ ) of  $\text{NdSc}_3(\text{BO}_3)_4\text{:R}$  (R = Sm).

| Site | x/a        | y/b        | z/c       | Occ.      | Ueq    | U11       | U22        | U33        | U23         | U13        | U12        |
|------|------------|------------|-----------|-----------|--------|-----------|------------|------------|-------------|------------|------------|
| Nd1  | 0.66725(5) | 0.66725(5) | 0.5       | 0.910(1)  | 0.0001 | 0.0002(2) | 0.0002(2)  | -0.0005(2) | -0.00020(6) | 0.00020(6) | -0.0002(1) |
| Sc1  | 0          | 0.8744(3)  | 5/6       | 0.914(1)  | 0.0406 | 0.0019(6) | 0.0010(5)  | 0.1190(9)  | 0.0022(4)   | 0.0044(7)  | 0.0010(3)  |
| Sc2  | 0.2150(2)  | 0.6708(1)  | 0.4973(1) | 0.891(1)  | 0.0007 | 0.0040(4) | 0.001(4)   | -0.0040(3) | -0.0006(3)  | -0.0016(3) | 0.0011(3)  |
| Sm2  | 0.2150(2)  | 0.6708(1)  | 0.4973(1) | 0.0410(9) | 0.0007 | 0.0040(4) | 0.001(4)   | -0.0040(3) | -0.0006(3)  | -0.0016(3) | 0.0011(3)  |
| O1   | 0.6576(6)  | 0.8606(6)  | 0.6829(7) | 1         | 0.0179 | 0.0082(9) | 0.0092(9)  | 0.0352(9)  | 0.0029(9)   | 0.0158(9)  | 0.0036(8)  |
| O2   | 0.9628(7)  | 0.9155(7)  | 0.4005(8) | 0.5       | 0.0046 | 0.0036(9) | -0.0001(9) | 0.0093(9)  | -0.0003(9)  | 0.0001(9)  | 0.0002(9)  |
| O3   | 0.4506(5)  | 0.4785(5)  | 0.3212(5) | 1         | 0.0008 | 0.0017(8) | 0.0003(8)  | 0.0008(8)  | 0.0000(7)   | -0.0011(7) | 0.0009(7)  |
| O4   | 0.3555(5)  | 0.6008(5)  | 0.6451(5) | 1         | 0.0035 | 0.0078(8) | -0.0003(8) | 0.0016(8)  | -0.0003(8)  | -0.0001(8) | 0.0008(7)  |
| O5   | 0.6721(6)  | 0.8668(6)  | 0.3195(6) | 1         | 0.0154 | 0.0135(9) | 0.0247(9)  | 0.0133(9)  | -0.0144(8)  | -0.0128(8) | 0.0135(8)  |
| O6   | 0.8025(6)  | 0.8025(6)  | 0         | 1         | 0.0360 | 0.0058(6) | 0.058(6)   | 0.010(1)   | 0.0034(7)   | -0.0034(7) | 0.0055(8)  |
| O7   | 0.6612(5)  | 0.5226(5)  | 0.0008(5) | 1         | 0.0013 | 0.0055(8) | -0.0007(8) | -0.0010(8) | 0.0009(7)   | -0.0013(8) | 0.0012(7)  |
| B1   | 0.8866(6)  | 0.5439(6)  | 0.6731(6) | 1         | 0.0009 | 0.0003(8) | 0.0000(8)  | 0.0004(9)  | 0.0002(8)   | -0.0002(8) | 0.0015(8)  |
| B2   | 0.6701(6)  | 0.6701(6)  | 0         | 1         | 0.0038 | 0.0023(6) | 0.0023(6)  | 0.0049(9)  | -0.0020(6)  | 0.0020(6)  | 0.0004(8)  |
| B3   | 0.7906(8)  | 0          | 2/3       | 1         | 0.0393 | 0.0039(9) | 0.0125(9)  | 0.104(1)   | 0.0006(9)   | 0.0003(4)  | 0.0062(4)  |

**Table S15.** Crystallographic coordinates, occupancies and equivalent/isotropic atomic displacement parameters ( $\text{\AA}^2$ ) of  $\text{NdSc}_3(\text{BO}_3)_4\text{:R}$  (R = Eu).

| Site | x/a        | y/b        | z/c        | Occ.     | Ueq    | U11       | U22       | U33       | U23       | U13       | U12       |
|------|------------|------------|------------|----------|--------|-----------|-----------|-----------|-----------|-----------|-----------|
| Nd1  | 0          | 0          | 0          | 0.952(2) | 0.0012 | 0.0012(4) | 0.0012(4) | 0.0013(5) | 0.0000(1) | 0.0000(1) | 0.0006(2) |
| Eu1  | 0          | 0          | 0          | 0.117(2) | 0.0012 | 0.0012(4) | 0.0012(4) | 0.0013(5) | 0.0000(1) | 0.0000(1) | 0.0006(2) |
| Sc2  | 0.5449(5)  | 0          | 0          | 0.808(3) | 0.0080 | 0.0051(9) | 0.005(1)  | 0.014(1)  | 0.0024(9) | 0.0012(4) | 0.0023(5) |
| Eu2  | 0.5449(5)  | 0          | 0          | 0.108(2) | 0.0080 | 0.0051(9) | 0.005(1)  | 0.014(1)  | 0.0024(9) | 0.0012(4) | 0.0023(5) |
| O1   | 0.8592(14) | 0          | 0.5        | 1        | 0.0041 | 0.001(2)  | 0.004(2)  | 0.008(2)  | 0.0000(1) | 0.0000(1) | 0.001(1)  |
| O2   | 0.592(2)   | 0          | 0.5        | 1        | 0.0496 | 0.022(2)  | 0.066(2)  | 0.075(2)  | -0.061(2) | -0.031(1) | 0.033(1)  |
| O3   | 0.4587(15) | 0.1419(13) | 0.5152(15) | 1        | 0.0081 | 0.012(2)  | 0.003(2)  | 0.007(2)  | 0.000(2)  | 0.003(2)  | 0.002(2)  |
| B1   | 0          | 0          | 0.5        | 1        | 0.0018 | 0.0000(1) | 0.0000(1) | 0.005(2)  | 0         | 0         | 0.0000(1) |
| B2   | 0.4532(18) | 0          | 0.5        | 1        | 0.0070 | 0.001(2)  | 0.005(2)  | 0.016(2)  | -0.002(2) | -0.001(1) | 0.003(1)  |

**Table S16.** Crystallographic coordinates, occupancies and equivalent/isotropic atomic displacement parameters ( $\text{\AA}^2$ ) of  $\text{NdSc}_3(\text{BO}_3)_4\text{:R}$  (R = Gd).

| Site | x/a        | y/b        | z/c        | Occ.      | Ueq    | U11       | U22        | U33        | U23         | U13        | U12        |
|------|------------|------------|------------|-----------|--------|-----------|------------|------------|-------------|------------|------------|
| Nd1  | 0.66727(4) | 0.66727(4) | 0.5        | 0.909(1)  | 0.0045 | 0.0042(1) | 0.0042(1)  | 0.0046(2)  | -0.00012(5) | 0.00012(5) | 0.0017(1)  |
| Gd1  | 0.66727(4) | 0.66727(4) | 0.5        | 0.103(1)  | 0.0045 | 0.0042(1) | 0.0042(1)  | 0.0046(2)  | -0.00012(5) | 0.00012(5) | 0.0017(1)  |
| Sc1  | 0          | 0.8747(2)  | 5/6        | 0.953(1)  | 0.0321 | 0.0009(5) | -0.0002(4) | 0.0957(9)  | 0.0008(3)   | 0.0017(6)  | 0.0003(3)  |
| Sc2  | 0.2139(1)  | 0.6701(1)  | 0.49740(7) | 0.871(1)  | 0.0011 | 0.0037(3) | 0.0019(3)  | -0.0026(3) | -0.0006(2)  | -0.0015(2) | 0.0012(2)  |
| Gd2  | 0.2139(1)  | 0.6701(1)  | 0.49740(7) | 0.0664(9) | 0.0011 | 0.0037(3) | 0.0019(3)  | -0.0026(3) | -0.0006(2)  | -0.0015(2) | 0.0012(2)  |
| O1   | 0.6586(6)  | 0.8604(6)  | 0.6831(7)  | 1         | 0.0212 | 0.0068(8) | 0.0094(9)  | 0.0461(9)  | -0.018(9)   | 0.0072(9)  | 0.0031(8)  |
| O2   | 0.9627(7)  | 0.9161(7)  | 0.4013(7)  | 0.5       | 0.0078 | 0.0034(9) | 0.0001(9)  | 0.0192(9)  | -0.0005(9)  | 0.0000(9)  | 0.0004(8)  |
| O3   | 0.4527(4)  | 0.4791(4)  | 0.3194(4)  | 1         | 0.0026 | 0.0034(8) | 0.0000(8)  | 0.0047(8)  | 0.0002(7)   | -0.0017(7) | 0.0011(7)  |
| O4   | 0.3555(5)  | 0.6013(4)  | 0.6447(5)  | 1         | 0.0066 | 0.0101(8) | 0.0020(7)  | 0.0084(8)  | -0.0034(7)  | -0.0035(8) | 0.0035(7)  |
| O5   | 0.6734(5)  | 0.8676(6)  | 0.3202(6)  | 1         | 0.0131 | 0.0112(8) | 0.0193(9)  | 0.0137(8)  | -0.0081(8)  | -0.0077(8) | 0.0112(7)  |
| O6   | 0.8029(6)  | 0.8029(6)  | 0          | 1         | 0.0411 | 0.0089(6) | 0.0089(6)  | 0.1088(10) | 0.0048(7)   | -0.0048(7) | 0.0068(8)  |
| O7   | 0.6624(4)  | 0.5232(5)  | 0.0001(4)  | 1         | 0.0015 | 0.0053(8) | -0.0005(8) | -0.0001(8) | -0.0002(6)  | -0.0010(7) | 0.0013(6)  |
| B1   | 0.8850(5)  | 0.5433(5)  | 0.6722(5)  | 1         | 0.0005 | 0.0001(8) | 0.0012(8)  | -0.0003(8) | 0.0004(7)   | 0.0006(8)  | 0.0019(7)  |
| B2   | 0.6682(5)  | 0.6682(5)  | 0          | 1         | 0.0023 | 0.0020(6) | 0.0020(6)  | 0.0011(9)  | -0.0007(5)  | 0.0007(5)  | -0.0003(8) |
| B3   | 0.7913(8)  | 0          | 2/3        | 1         | 0.0349 | 0.0082(9) | 0.0295(9)  | 0.0743(10) | 0.0212(9)   | 0.0106(4)  | 0.0148(4)  |

**Table S17.** Crystallographic coordinates, occupancies and equivalent/isotropic atomic displacement parameters ( $\text{\AA}^2$ ) of  $\text{NdSc}_3(\text{BO}_3)_4\text{:R}$  (R = Tb).

| Site | x/a        | y/b        | z/c        | Occ.     | Ueq    | U11       | U22        | U33        | U23         | U13        | U12        |
|------|------------|------------|------------|----------|--------|-----------|------------|------------|-------------|------------|------------|
| Nd1  | 0.66735(4) | 0.66735(4) | 0.5        | 0.884(1) | 0.0043 | 0.0041(1) | 0.0041(1)  | 0.0041(2)  | -0.00012(5) | 0.00012(5) | 0.0016(1)  |
| Tb1  | 0.66735(4) | 0.66735(4) | 0.5        | 0.080(1) | 0.0043 | 0.0041(1) | 0.0041(1)  | 0.0041(2)  | -0.00012(5) | 0.00012(5) | 0.0016(1)  |
| Sc1  | 0          | 0.8752(2)  | 5/6        | 0.897(1) | 0.0341 | 0.0018(5) | 0.0002(4)  | 0.1003(9)  | 0.0008(3)   | 0.0015(6)  | 0.0005(3)  |
| Sc2  | 0.2145(2)  | 0.67030(9) | 0.49728(7) | 1.015(1) | 0.0008 | 0.0031(3) | 0.0017(3)  | -0.0031(3) | -0.0004(2)  | -0.0015(2) | 0.0008(2)  |
| O1   | 0.6578(5)  | 0.8607(6)  | 0.6824(7)  | 1        | 0.0265 | 0.0122(8) | 0.0126(9)  | 0.0546(9)  | 0.0030(9)   | 0.0207(8)  | 0.0060(7)  |
| O2   | 0.9614(6)  | 0.9156(6)  | 0.3993(7)  | 0.5      | 0.0091 | 0.0031(9) | 0.0032(9)  | 0.0226(9)  | -0.0011(9)  | -0.0002(9) | 0.0029(8)  |
| O3   | 0.4533(4)  | 0.4793(4)  | 0.3197(4)  | 1        | 0.0051 | 0.0079(8) | 0.0032(8)  | 0.0052(8)  | -0.0002(7)  | -0.0036(7) | 0.0035(7)  |
| O4   | 0.3559(4)  | 0.6019(4)  | 0.6434(4)  | 1        | 0.0062 | 0.0086(8) | 0.0040(7)  | 0.0071(8)  | -0.0036(7)  | -0.0009(7) | 0.0039(7)  |
| O5   | 0.6727(5)  | 0.8663(5)  | 0.3217(5)  | 1        | 0.0168 | 0.0154(8) | 0.0246(9)  | 0.0177(8)  | -0.0177(8)  | -0.0162(8) | 0.0155(7)  |
| O6   | 0.8038(6)  | 0.8038(6)  | 0          | 1        | 0.0522 | 0.0078(6) | 0.0078(6)  | 0.1430(10) | 0.0037(7)   | -0.0037(7) | 0.0054(8)  |
| O7   | 0.6624(4)  | 0.5233(4)  | -0.0008(3) | 1        | 0.0030 | 0.0096(8) | -0.0002(7) | 0.0002(8)  | 0.0003(6)   | -0.0009(7) | 0.0027(6)  |
| B1   | 0.8856(5)  | 0.5432(5)  | 0.6723(5)  | 1        | 0.0007 | 0.0002(8) | 0.0035(8)  | 0.0011(8)  | 0.0004(7)   | 0.0000(8)  | 0.0030(7)  |
| B2   | 0.6692(5)  | 0.6692(5)  | 0          | 1        | 0.0040 | 0.0021(6) | 0.0021(6)  | 0.0053(9)  | -0.0014(5)  | 0.0014(5)  | -0.0009(8) |
| B3   | 0.7912(7)  | 0          | 2/3        | 1        | 0.0401 | 0.0010(9) | 0.0045(8)  | 0.1159(10) | 0.0007(9)   | 0.0003(4)  | 0.0023(4)  |

**Table S18.** Crystallographic coordinates, occupancies and equivalent/isotropic atomic displacement parameters ( $\text{\AA}^2$ ) of  $\text{NdSc}_3(\text{BO}_3)_4\text{:R}$  (R = Dy).

| Site | x/a        | y/b        | z/c        | Occ.     | Ueq    | U11       | U22        | U33        | U23         | U13        | U12        |
|------|------------|------------|------------|----------|--------|-----------|------------|------------|-------------|------------|------------|
| Nd1  | 0.66732(4) | 0.66732(4) | 0.5        | 0.919(1) | 0.0039 | 0.0039(2) | 0.0039(2)  | 0.0031(2)  | -0.00014(5) | 0.00014(5) | 0.0014(1)  |
| Dy1  | 0.66732(4) | 0.66732(4) | 0.5        | 0.103(1) | 0.0039 | 0.0039(2) | 0.0039(2)  | 0.0031(2)  | -0.00014(5) | 0.00014(5) | 0.0014(1)  |
| Sc1  | 0          | 0.8751(3)  | 5/6        | 0.966(1) | 0.0330 | 0.0012(6) | -0.0004(4) | 0.0984(9)  | 0.0008(3)   | 0.0016(7)  | 0.0004(3)  |
| Sc2  | 0.2142(2)  | 0.6703(1)  | 0.49734(7) | 0.850(1) | 0.0009 | 0.0035(3) | 0.0020(3)  | -0.0031(3) | -0.0005(2)  | -0.0015(2) | 0.0012(2)  |
| Dy2  | 0.2142(2)  | 0.6703(1)  | 0.49734(7) | 0.072(1) | 0.0009 | 0.0035(3) | 0.0020(3)  | -0.0031(3) | -0.0005(2)  | -0.0015(2) | 0.0012(2)  |
| O1   | 0.6595(5)  | 0.8618(6)  | 0.6833(7)  | 1        | 0.0207 | 0.0068(8) | 0.0115(9)  | 0.0419(9)  | -0.0025(9)  | 0.0153(8)  | 0.0033(8)  |
| O2   | 0.9632(7)  | 0.9167(7)  | 0.4027(8)  | 0.5      | 0.0093 | 0.0041(9) | -0.0003(9) | 0.0242(9)  | -0.0004(9)  | 0.0001(9)  | 0.0010(8)  |
| O3   | 0.4530(4)  | 0.4787(4)  | 0.3194(4)  | 1        | 0.0016 | 0.0031(8) | 0.0000(8)  | 0.0018(8)  | 0.0001(7)   | -0.0012(7) | 0.0008(7)  |
| O4   | 0.3551(5)  | 0.6008(4)  | 0.6448(5)  | 1        | 0.0045 | 0.0076(8) | 0.0001(7)  | 0.0045(8)  | -0.0005(7)  | -0.0003(8) | 0.0009(7)  |
| O5   | 0.6738(5)  | 0.8685(6)  | 0.3201(6)  | 1        | 0.0121 | 0.0092(8) | 0.0205(9)  | 0.0110(9)  | -0.0096(8)  | -0.0092(8) | 0.0108(7)  |
| O6   | 0.8030(6)  | 0.8030(6)  | 0          | 1        | 0.0463 | 0.0050(6) | 0.0050(6)  | 0.1299(10) | 0.0074(7)   | -0.0074(7) | 0.0033(8)  |
| O7   | 0.6623(4)  | 0.5234(5)  | -0.0004(4) | 1        | 0.0011 | 0.0059(8) | -0.0010(8) | -0.0008(8) | 0.0004(6)   | 0.0012(7)  | 0.0018(7)  |
| B1   | 0.8853(5)  | 0.5428(5)  | 0.6723(5)  | 1        | 0.0013 | 0.0005(8) | 0.0006(8)  | -0.0004(8) | 0.0006(7)   | 0.0001(8)  | 0.0028(7)  |
| B2   | 0.6694(5)  | 0.6694(5)  | 0          | 1        | 0.0016 | 0.0006(6) | 0.0006(6)  | 0.0026(9)  | -0.0012(6)  | 0.0012(6)  | -0.0005(8) |
| B3   | 0.7914(8)  | 0          | 2/3        | 1        | 0.0353 | 0.0016(9) | 0.0058(8)  | 0.0999(10) | 0.0006(9)   | 0.0003(4)  | 0.0029(4)  |

**Table S19.** Crystallographic coordinates, occupancies and equivalent/isotropic atomic displacement parameters ( $\text{\AA}^2$ ) of  $\text{NdSc}_3(\text{BO}_3)_4\text{:R}$  (R = Ho).

| Site | x/a        | y/b        | z/c        | Occ.     | Ueq    | U11       | U22       | U33        | U23         | U13        | U12       |
|------|------------|------------|------------|----------|--------|-----------|-----------|------------|-------------|------------|-----------|
| Nd1  | 0.66722(4) | 0.66722(4) | 0.5        | 0.936(1) | 0.0113 | 0.0122(1) | 0.0122(1) | 0.0087(1)  | -0.00026(4) | 0.00026(4) | 0.0055(1) |
| Ho1  | 0.66722(4) | 0.66722(4) | 0.5        | 0.091(1) | 0.0113 | 0.0122(1) | 0.0122(1) | 0.0087(1)  | -0.00026(4) | 0.00026(4) | 0.0055(1) |
| Sc1  | 0          | 0.8754(2)  | 5/6        | 1.006(1) | 0.0353 | 0.0070(5) | 0.0065(4) | 0.0926(9)  | 0.0006(3)   | 0.0012(6)  | 0.0035(2) |
| Sc2  | 0.2137(1)  | 0.67005(9) | 0.49742(5) | 0.832(1) | 0.0068 | 0.0107(3) | 0.0092(2) | 0.0002(2)  | -0.0008(2)  | -0.0016(1) | 0.0046(2) |
| Ho2  | 0.2137(1)  | 0.67005(9) | 0.49742(5) | 0.090(1) | 0.0068 | 0.0107(3) | 0.0092(2) | 0.0002(2)  | -0.0008(2)  | -0.0016(1) | 0.0046(2) |
| O1   | 0.6569(5)  | 0.8607(5)  | 0.6827(7)  | 1        | 0.0280 | 0.0192(8) | 0.0171(8) | 0.0459(9)  | 0.0068(8)   | 0.0223(8)  | 0.0078(8) |
| O2   | 0.9645(7)  | 0.9175(7)  | 0.3987(7)  | 0.5      | 0.0164 | 0.0086(9) | 0.0070(9) | 0.0315(9)  | -0.0035(9)  | 0.0020(9)  | 0.0024(8) |
| O3   | 0.4528(4)  | 0.4784(4)  | 0.3195(4)  | 1        | 0.0102 | 0.0151(8) | 0.0113(8) | 0.0065(7)  | -0.0008(6)  | -0.0027(6) | 0.0083(6) |
| O4   | 0.3560(5)  | 0.6017(4)  | 0.6443(4)  | 1        | 0.0130 | 0.0194(8) | 0.0118(7) | 0.0099(7)  | -0.0042(7)  | -0.0035(7) | 0.0093(7) |
| O5   | 0.6752(5)  | 0.8679(5)  | 0.3188(5)  | 1        | 0.0224 | 0.0294(8) | 0.0343(9) | 0.0154(8)  | -0.0131(8)  | -0.0139(7) | 0.0248(7) |
| O6   | 0.8021(6)  | 0.8021(6)  | 0          | 1        | 0.0495 | 0.0137(6) | 0.0137(6) | 0.1218(10) | 0.0057(7)   | -0.0057(7) | 0.0072(8) |
| O7   | 0.6618(4)  | 0.5227(4)  | -0.0003(3) | 1        | 0.0081 | 0.0145(8) | 0.0073(8) | 0.0045(7)  | 0.0003(6)   | -0.0035(6) | 0.0070(6) |
| B1   | 0.8862(5)  | 0.5424(5)  | 0.6718(4)  | 1        | 0.0059 | 0.0088(8) | 0.0105(8) | 0.0040(7)  | 0.0010(7)   | 0.0020(7)  | 0.0089(7) |
| B2   | 0.6718(5)  | 0.6718(5)  | 0          | 1        | 0.0083 | 0.0062(6) | 0.0062(6) | 0.0087(9)  | -0.0049(5)  | 0.0049(5)  | 0.0001(8) |
| B3   | 0.7929(7)  | 0          | 2/3        | 1        | 0.0473 | 0.0090(9) | 0.0288(9) | 0.1107(10) | 0.0076(9)   | 0.0038(4)  | 0.0144(4) |

**Table S20.** Crystallographic coordinates, occupancies and equivalent/isotropic atomic displacement parameters ( $\text{\AA}^2$ ) of  $\text{NdSc}_3(\text{BO}_3)_4\text{:R}$  (R = Er).

| Site | x/a       | y/b       | z/c       | Occ.     | Ueq    | U11        | U22        | U33        | U23        | U13        | U12       |
|------|-----------|-----------|-----------|----------|--------|------------|------------|------------|------------|------------|-----------|
| Nd1  | 0         | 0         | 0         | 0.964(1) | 0.0046 | 0.0046(1)  | 0.0046(1)  | 0.0045(2)  | 0.0000(1)  | 0.0000(1)  | 0.0023(7) |
| Er1  | 0         | 0         | 0         | 0.100(1) | 0.0046 | 0.0046(1)  | 0.0046(1)  | 0.0045(2)  | 0.0000(1)  | 0.0000(1)  | 0.0023(7) |
| Sc2  | 0.5440(1) | 0         | 0         | 0.658(1) | 0.0062 | 0.0037(3)  | 0.0035(3)  | 0.0111(4)  | 0.0017(2)  | 0.0009(1)  | 0.0017(2) |
| Er2  | 0.5440(1) | 0         | 0         | 0.166(1) | 0.0062 | 0.0037(3)  | 0.0035(3)  | 0.0111(4)  | 0.0017(2)  | 0.0009(1)  | 0.0017(2) |
| O1   | 0.8596(5) | 0         | 0.5       | 1        | 0.0064 | 0.0024(9)  | 0.0072(10) | 0.0113(11) | -0.0009(9) | -0.0004(5) | 0.0036(5) |
| O2   | 0.5935(8) | 0         | 0.5       | 1        | 0.0690 | 0.024(1)   | 0.088(1)   | 0.116(1)   | -0.094(1)  | -0.0471(5) | 0.0443(6) |
| O3   | 0.4588(5) | 0.1415(5) | 0.5144(5) | 1        | 0.0102 | 0.0156(10) | 0.0042(9)  | 0.0088(10) | 0.0001(8)  | 0.0033(9)  | 0.0035(8) |
| B1   | 0         | 0         | 0.5       | 1        | 0.0027 | 0.0025(8)  | 0.0025(8)  | 0.0030(12) | 0          | 0          | 0.0013(4) |
| B2   | 0.4531(7) | 0         | 0.5       | 1        | 0.0101 | 0.0056(10) | 0.009(1)   | 0.017(1)   | -0.009(1)  | -0.0046(5) | 0.0048(5) |

**Table S21.** Crystallographic coordinates, occupancies and equivalent/isotropic atomic displacement parameters ( $\text{\AA}^2$ ) of  $\text{NdSc}_3(\text{BO}_3)_4\text{:R}$  (R = Tm).

| Site | x/a        | y/b       | z/c       | Occ.     | Ueq    | U11        | U22        | U33        | U23        | U13        | U12        |
|------|------------|-----------|-----------|----------|--------|------------|------------|------------|------------|------------|------------|
| Nd1  | 0          | 0         | 0         | 0.897(1) | 0.0077 | 0.00746(8) | 0.00746(8) | 0.0082(1)  | 0.0000(1)  | 0.0000(1)  | 0.00373(4) |
| Tm1  | 0          | 0         | 0         | 0.131(1) | 0.0077 | 0.00746(8) | 0.00746(8) | 0.0082(1)  | 0.0000(1)  | 0.0000(1)  | 0.00373(4) |
| Sc2  | 0.54377(6) | 0         | 0         | 0.782(1) | 0.0081 | 0.0056(1)  | 0.0052(2)  | 0.0133(2)  | 0.0016(1)  | 0.00081(5) | 0.00251(8) |
| Tm2  | 0.54377(6) | 0         | 0         | 0.153(1) | 0.0081 | 0.0056(1)  | 0.0052(2)  | 0.0133(2)  | 0.0016(1)  | 0.00081(5) | 0.00251(8) |
| O1   | 0.8595(3)  | 0         | 0.5       | 1        | 0.0087 | 0.0045(5)  | 0.0084(7)  | 0.0145(8)  | -0.0010(6) | -0.0005(3) | 0.0042(3)  |
| O2   | 0.5930(4)  | 0         | 0.5       | 1        | 0.0697 | 0.0223(7)  | 0.0834(10) | 0.124(1)   | -0.0916(9) | -0.0458(5) | 0.0417(5)  |
| O3   | 0.4588(3)  | 0.1415(2) | 0.5144(3) | 1        | 0.0127 | 0.0175(7)  | 0.0068(6)  | 0.0121(6)  | 0.0004(5)  | 0.0033(6)  | 0.0048(5)  |
| B1   | 0          | 0         | 0.5       | 1        | 0.0060 | 0.0053(6)  | 0.0053(6)  | 0.0074(10) | 0          | 0          | 0.0026(3)  |
| B2   | 0.4537(4)  | 0         | 0.5       | 1        | 0.0136 | 0.0077(7)  | 0.0145(9)  | 0.0208(9)  | -0.0102(9) | -0.0051(4) | 0.0072(5)  |

**Table S22.** Crystallographic coordinates, occupancies and equivalent/isotropic atomic displacement parameters ( $\text{\AA}^2$ ) of  $\text{NdSc}_3(\text{BO}_3)_4\text{:R}$  (R = Yb).

| Site | x/a       | y/b       | z/c       | Occ.     | Ueq    | U11        | U22        | U33        | U23         | U13        | U12        |
|------|-----------|-----------|-----------|----------|--------|------------|------------|------------|-------------|------------|------------|
| Nd1  | 0         | 0         | 0         | 0.966(1) | 0.0050 | 0.0051(2)  | 0.0051(2)  | 0.0048(2)  | 0.0000(1)   | 0.0000(1)  | 0.00253(8) |
| Yb1  | 0         | 0         | 0         | 0.113(1) | 0.0050 | 0.0051(2)  | 0.0051(2)  | 0.0048(2)  | 0.0000(1)   | 0.0000(1)  | 0.00253(8) |
| Sc2  | 0.5449(1) | 0         | 0         | 0.659(1) | 0.0051 | 0.0027(3)  | 0.0023(3)  | 0.0103(5)  | 0.0017(2)   | 0.0008(1)  | 0.0012(2)  |
| Yb2  | 0.5449(1) | 0         | 0         | 0.149(1) | 0.0051 | 0.0027(3)  | 0.0023(3)  | 0.0103(5)  | 0.0017(2)   | 0.0008(1)  | 0.0012(2)  |
| O1   | 0.8589(5) | 0         | 0.5       | 1        | 0.0061 | 0.0027(9)  | 0.0043(9)  | 0.0118(10) | -0.0004(9)  | -0.0002(4) | 0.0021(4)  |
| O2   | 0.5925(7) | 0         | 0.5       | 1        | 0.0602 | 0.0190(10) | 0.0723(10) | 0.107(1)   | -0.0776(10) | -0.0388(5) | 0.0362(5)  |
| O3   | 0.4584(5) | 0.1419(5) | 0.5152(5) | 1        | 0.0096 | 0.0127(9)  | 0.0048(9)  | 0.0085(9)  | 0.0001(8)   | 0.0044(9)  | 0.0023(8)  |
| B1   | 0         | 0         | 0.5       | 1        | 0.0037 | 0.0032(7)  | 0.0032(7)  | 0.0047(11) | 0           | 0          | 0.0016(4)  |
| B2   | 0.4533(6) | 0         | 0.5       | 1        | 0.0099 | 0.0033(9)  | 0.0109(10) | 0.0180(10) | -0.0102(10) | -0.0051(5) | 0.0054(5)  |

**Table S23.** Crystallographic coordinates, occupancies and equivalent/isotropic atomic displacement parameters ( $\text{\AA}^2$ ) of  $\text{NdSc}_3(\text{BO}_3)_4\text{:R}$  (R = Lu).

| Site | x/a        | y/b        | z/c        | Occ.     | Ueq    | U11        | U22        | U33        | U23         | U13        | U12        |
|------|------------|------------|------------|----------|--------|------------|------------|------------|-------------|------------|------------|
| Nd1  | 0.66687(5) | 0.66687(5) | 0.5        | 0.889(1) | 0.0059 | 0.0059(2)  | 0.0059(2)  | 0.0054(3)  | -0.00024(7) | 0.00024(7) | 0.0026(2)  |
| Lu1  | 0.66687(5) | 0.66687(5) | 0.5        | 0.078(1) | 0.0059 | 0.0059(2)  | 0.0059(2)  | 0.0054(3)  | -0.00024(7) | 0.00024(7) | 0.0026(2)  |
| Sc1  | 0          | 0.8745(3)  | 5/6        | 0.996(1) | 0.0280 | -0.0001(6) | -0.0024(5) | 0.0871(9)  | 0.0004(3)   | 0.0008(7)  | -0.0001(3) |
| Sc2  | 0.2130(2)  | 0.6698(1)  | 0.49795(7) | 0.886(1) | 0.0008 | 0.0034(3)  | 0.0015(3)  | -0.0030(3) | -0.0002(3)  | -0.0021(2) | 0.0008(2)  |
| Lu2  | 0.2130(2)  | 0.6698(1)  | 0.49795(7) | 0.108(1) | 0.0008 | 0.0034(3)  | 0.0015(3)  | -0.0030(3) | -0.0002(3)  | -0.0021(2) | 0.0008(2)  |
| O1   | 0.6616(6)  | 0.8626(6)  | 0.6879(7)  | 1        | 0.0230 | 0.0076(9)  | 0.0068(9)  | 0.0478(9)  | -0.0027(9)  | 0.0164(9)  | -0.0016(8) |
| O2   | 0.9645(8)  | 0.9150(8)  | 0.4081(8)  | 0.5      | 0.0176 | 0.0104(9)  | -0.0007(9) | 0.0424(9)  | 0.0001(9)   | -0.0004(9) | 0.0018(9)  |
| O3   | 0.4540(5)  | 0.4781(5)  | 0.3182(5)  | 1        | 0.0048 | 0.0052(8)  | 0.0057(8)  | 0.0040(8)  | -0.0003(8)  | 0.0018(8)  | 0.0032(7)  |
| O4   | 0.3525(6)  | 0.5992(6)  | 0.6495(5)  | 1        | 0.0134 | 0.0245(9)  | 0.0067(9)  | 0.0054(8)  | 0.0018(8)   | -0.0025(9) | 0.0052(8)  |
| O5   | 0.6775(6)  | 0.8720(7)  | 0.3182(6)  | 1        | 0.0201 | 0.0200(9)  | 0.0367(9)  | 0.0171(9)  | -0.0193(9)  | -0.0151(8) | 0.0243(8)  |
| O6   | 0.7987(6)  | 0.7987(6)  | 0          | 1        | 0.0408 | 0.0045(6)  | 0.0045(6)  | 0.1167(10) | 0.0005(7)   | -0.0005(7) | 0.0048(9)  |
| O7   | 0.6630(5)  | 0.5236(6)  | -0.0004(4) | 1        | 0.0026 | 0.0074(9)  | -0.0006(8) | -0.0018(9) | 0.0009(7)   | -0.0005(8) | 0.0023(7)  |
| B1   | 0.8848(6)  | 0.5456(6)  | 0.6717(6)  | 1        | 0.0021 | 0.0017(9)  | 0.0038(9)  | 0.0006(9)  | 0.0010(8)   | 0.0004(9)  | 0.0013(8)  |
| B2   | 0.6654(6)  | 0.6654(6)  | 0          | 1        | 0.0047 | 0.0039(6)  | 0.0039(6)  | 0.0038(9)  | -0.0013(6)  | 0.0013(6)  | -0.0001(9) |
| B3   | 0.7887(9)  | 0          | 2/3        | 1        | 0.0374 | 0.0178(9)  | 0.0297(8)  | 0.0688(10) | 0.0281(8)   | 0.0140(4)  | 0.0149(4)  |
